# Supplementary material for: A thorough annotation of the krill transcriptome offers new insights for the study of physiological processes
Source: Springer Nature journal article supplement (doi:10.1038/s41598-022-15320-5), 2022-07-06
Supplement: 41598_2022_15320_MOESM3_ESM.pdf [file 41598_2022_15320_MOESM3_ESM.pdf]

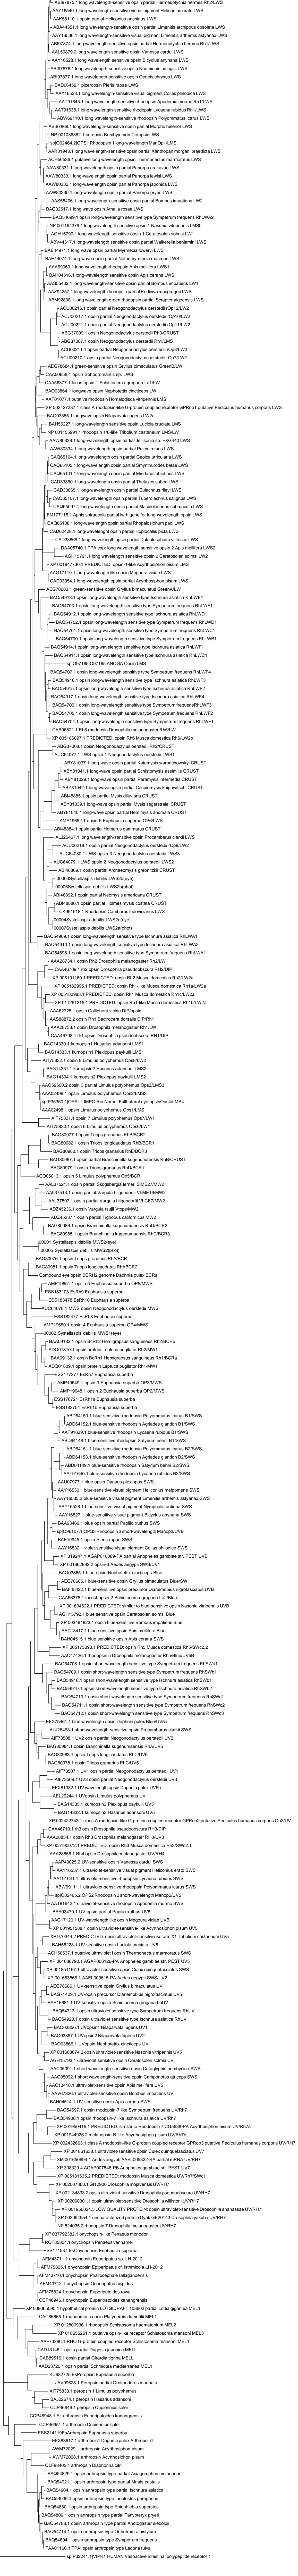

Fig S1. Phylogenetic relationships of *Euphausia superba* opsins shown as rectangular phylogram. Scale bars indicate amino acid substitutions per site.
